# Supplementary material for: Synthesis and Antimicrobial Activity of the Pathogenic E. coli Strains of p-Quinols: Additive Effects of Copper-Catalyzed Addition of Aryl Boronic Acid to Benzoquinones
Source: MDPI journal article supplement (doi:10.3390/ijms24021623), 2023-01-13
Supplement: s1 [file s1]

## Supplementary materials

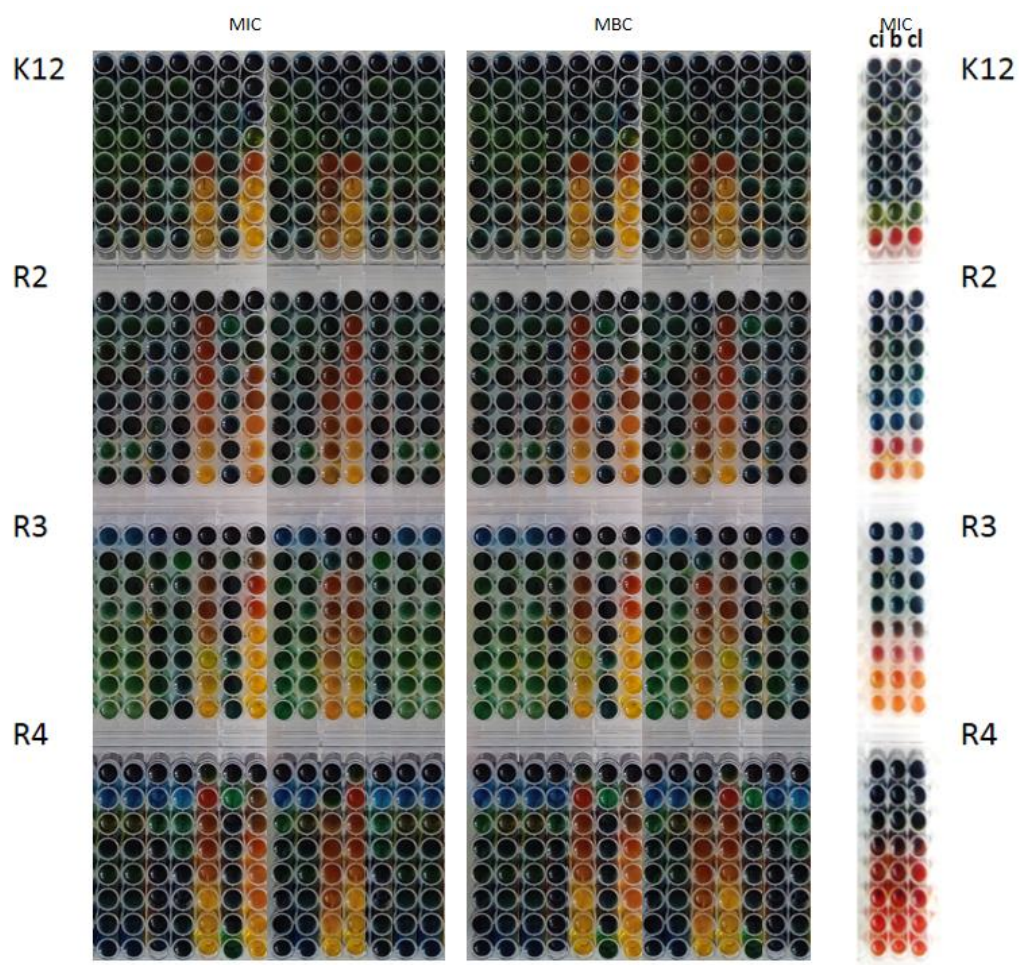

**Figure S1.** Examples of MIC and MBC on microplates with different concentration of studied compounds ( $\mu\text{g/mL}^{-1}$ ). Resazurin was added as an indicator of microbial growth with K12, R2, R3, and R4 strains with tested compounds, as described in Figure 4 and 5. Additionally, examples of MIC with different strains K12, R2, R3, and R4 of studied antibiotics with ciprofloxacin (ci), bleomycin (b), and cloxacillin (cl) in ( $\mu\text{g/mL}^{-1}$ ).

### Panel A

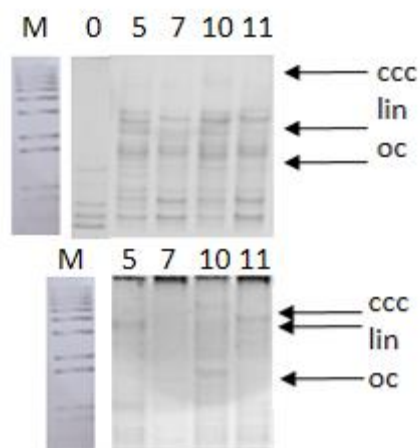

### Panel B

**Figure S2.** An example of an agarose gel electrophoresis separation of isolated plasmids DNA on R4 strains modified with selected coumarin derivatives (Panel A) from 4 selected compounds, as shown in Figure 3, and digested with repair Fpg protein (Panel B). M = marker.

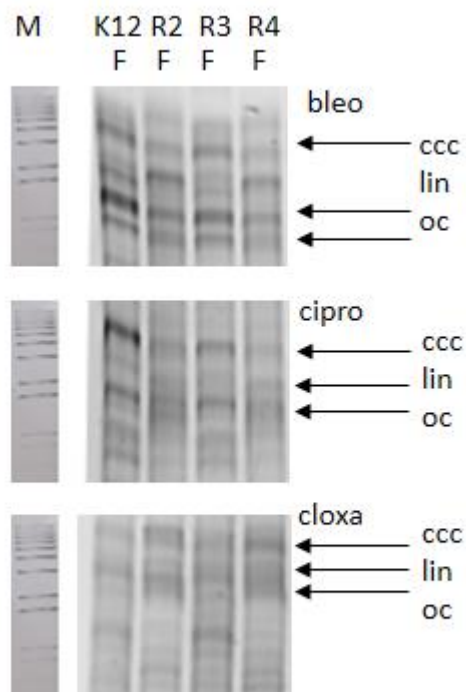

**Figure S3.** Example of an agarose gel electrophoresis separation of isolated plasmids DNA from K12 and R4 strains modified with antibiotics: bleomycin, ciprofloxacin, and cloxacillin digested (or not) with repair enzymes Fpg. M = marker.

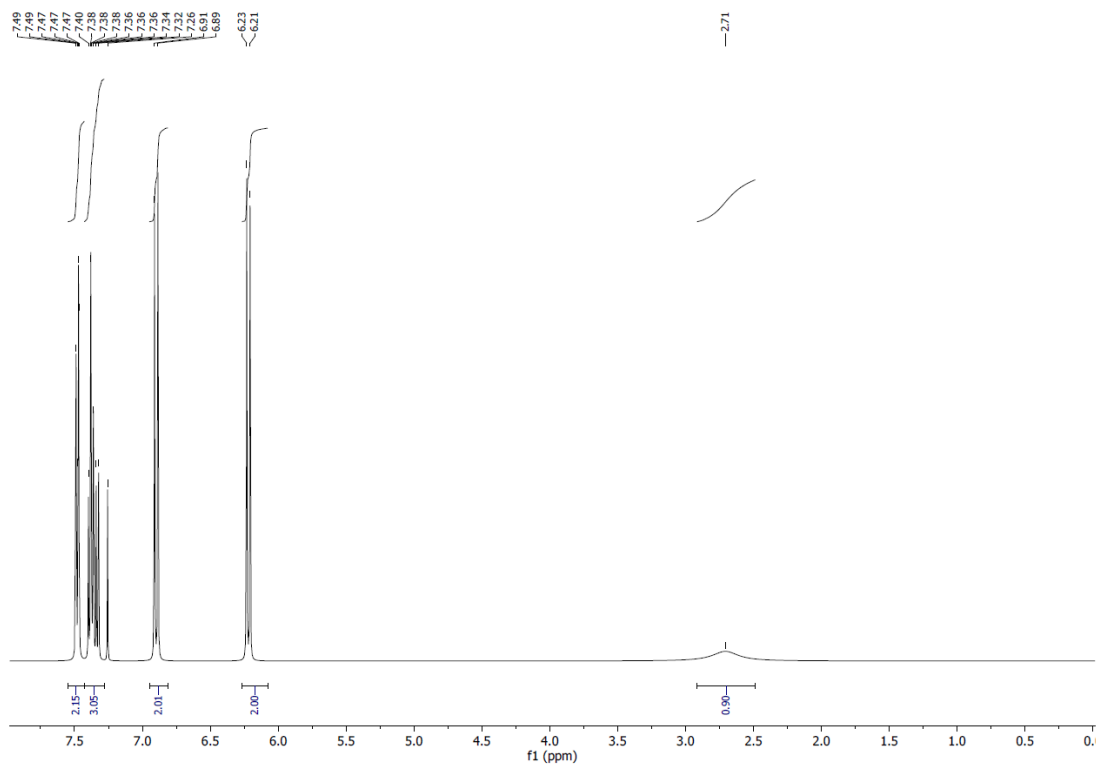

**Figure S4.** <sup>1</sup>H NMR spectra (400 MHz, CDCl<sub>3</sub>) of 4-hydroxy-4-phenyl-cyclohexa-2,5-dienone (1)

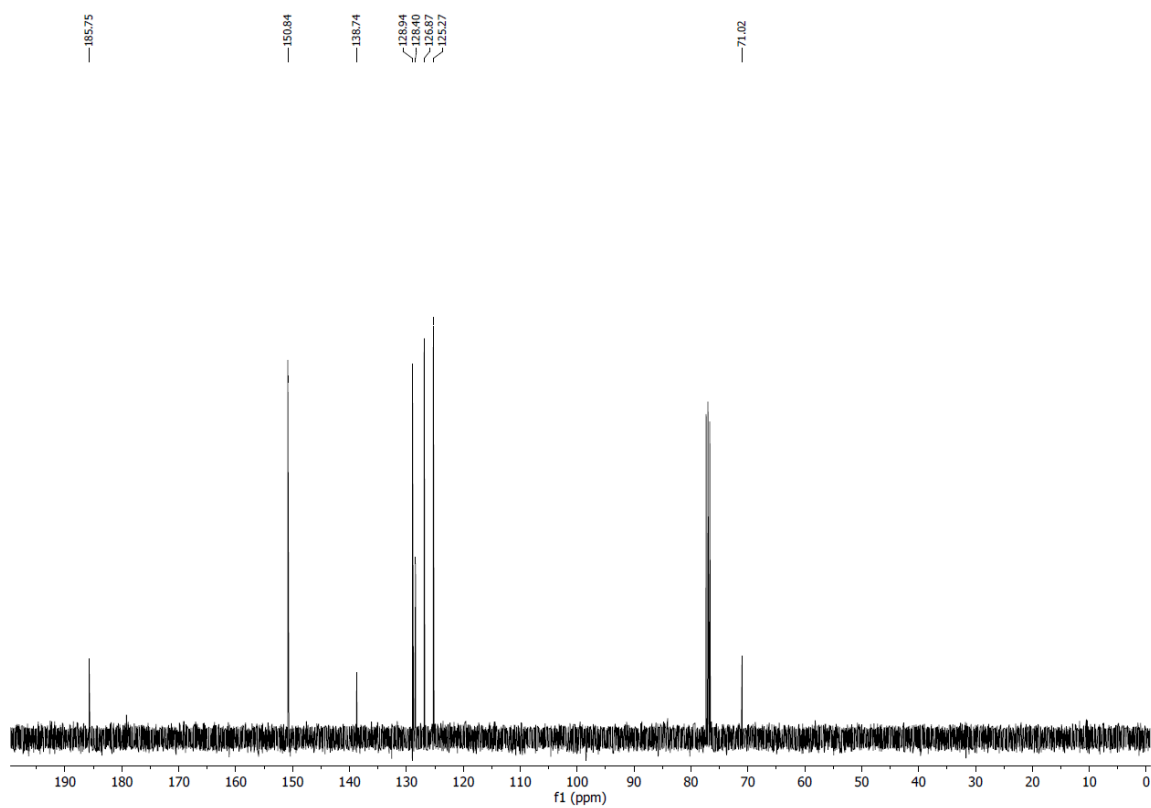

**Figure S5.** <sup>13</sup>C NMR spectra (100 MHz, CDCl<sub>3</sub>) of 4-hydroxy-4-phenyl-cyclohexa-2,5-dienone (1)

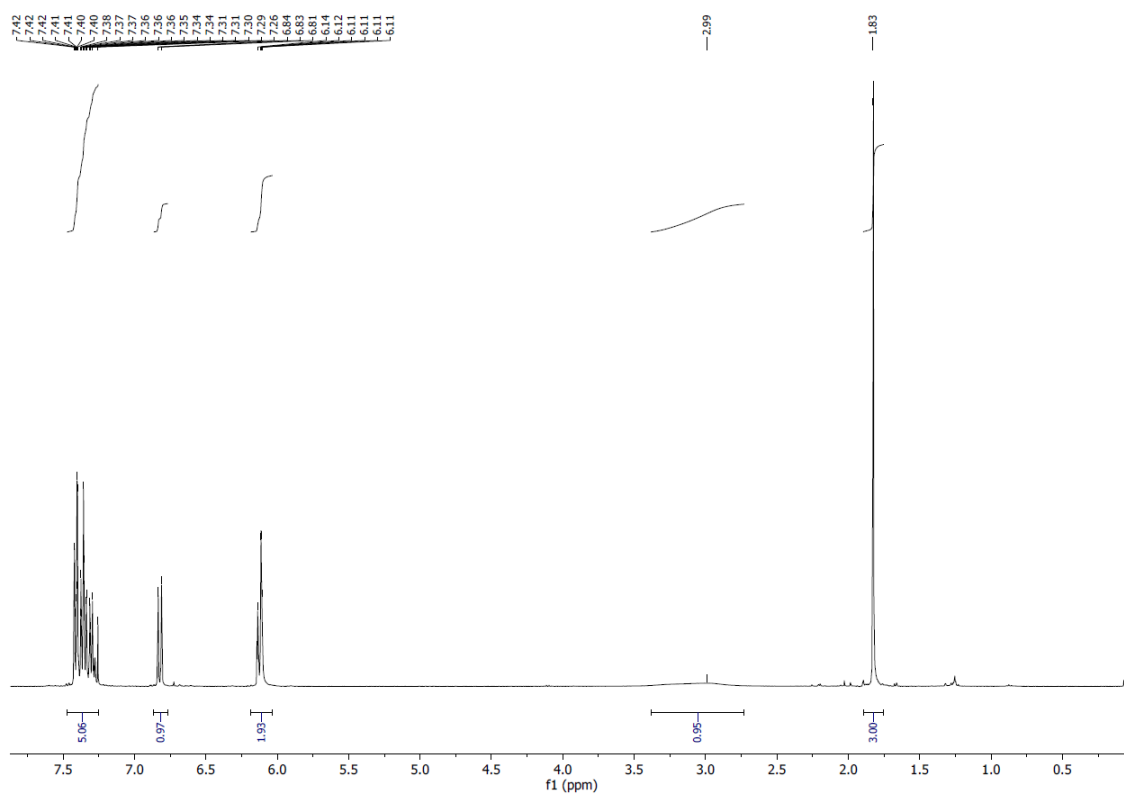

**Figure S6.**  $^1\text{H}$  NMR spectra (400 MHz,  $\text{CDCl}_3$ ) of 4-hydroxy-2-methyl-4-phenyl-2,5-cyclohexadienone (2)

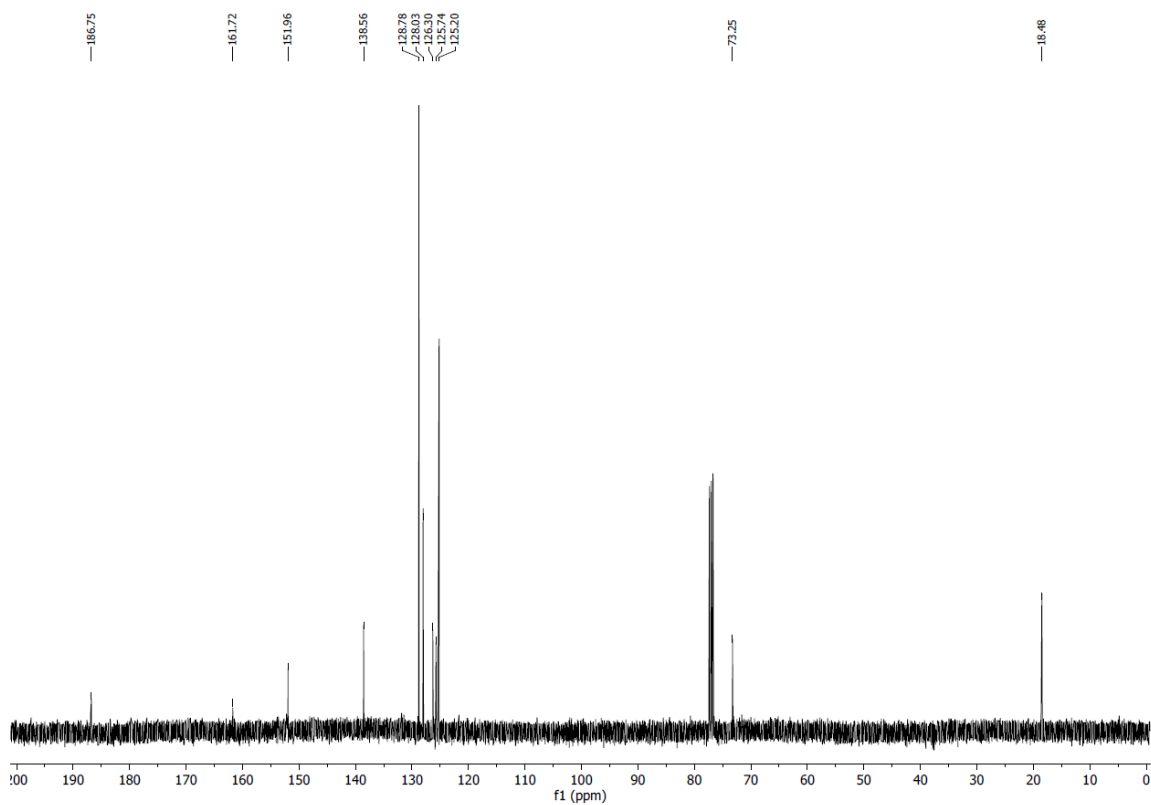

**Figure S7.**  $^{13}\text{C}$  NMR spectra (100 MHz,  $\text{CDCl}_3$ ) of 4-hydroxy-2-methyl-4-phenyl-2,5-cyclohexadienone (2)

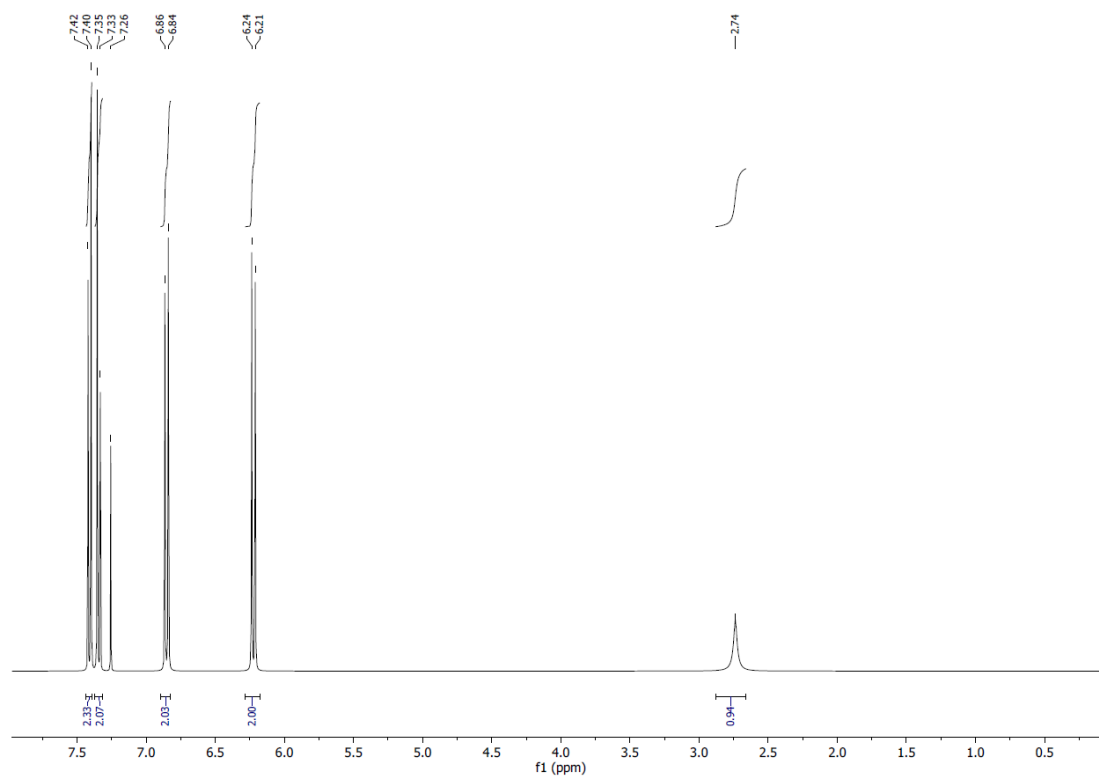

**Figure S8.** <sup>1</sup>H NMR spectra (400 MHz, CDCl<sub>3</sub>) of 4-hydroxy-4-(4'-chloro)-phenyl-cyclohexa-2,5-dienone (3)

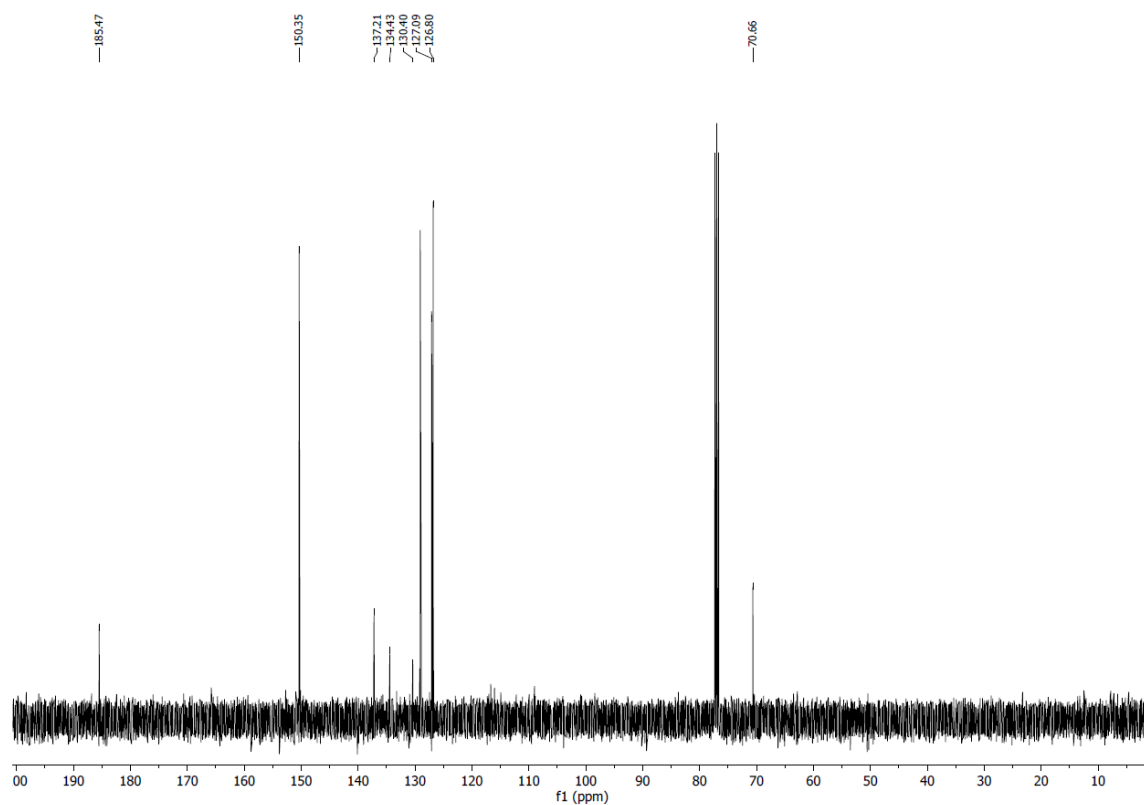

**Figure S9.** <sup>13</sup>C NMR spectra (100 MHz, CDCl<sub>3</sub>) of 4-hydroxy-4-(4'-chloro)-phenyl-cyclohexa-2,5-dienone (3)

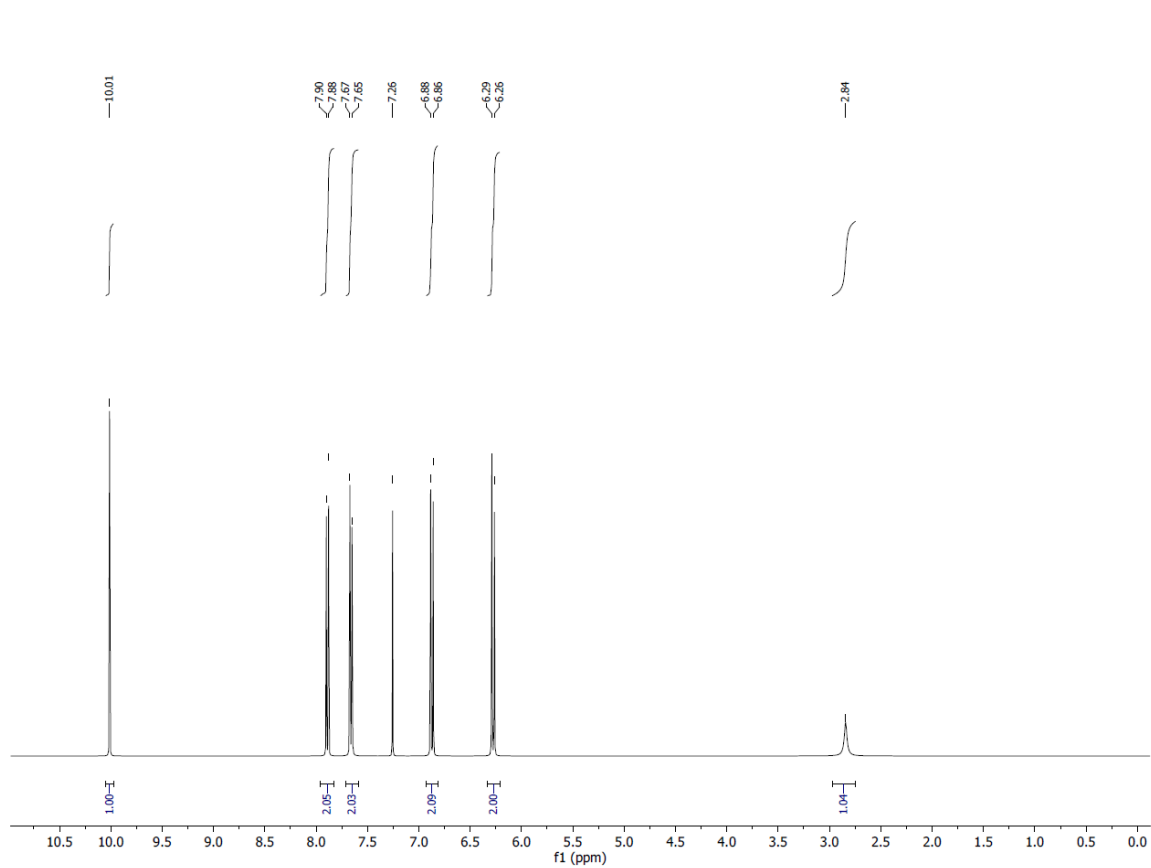

**Figure S10.** <sup>1</sup>H NMR spectra (400 MHz, CDCl<sub>3</sub>) of 4-hydroxy-4-(4'-formyl)-phenyl-cyclohexa-2,5-dienone (4)

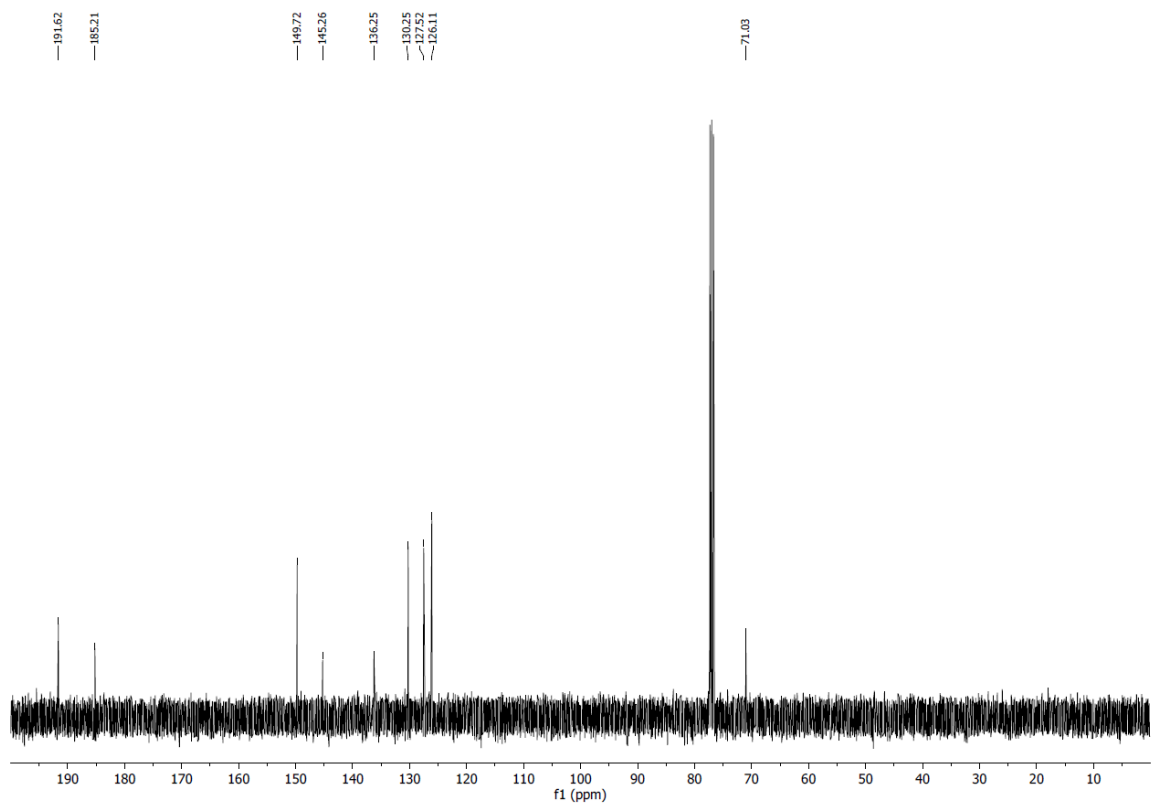

**Figure S11.** <sup>13</sup>C NMR spectra (100 MHz, CDCl<sub>3</sub>) of 4-hydroxy-4-(4'-formyl)-phenyl-cyclohexa-2,5-dienone (4)

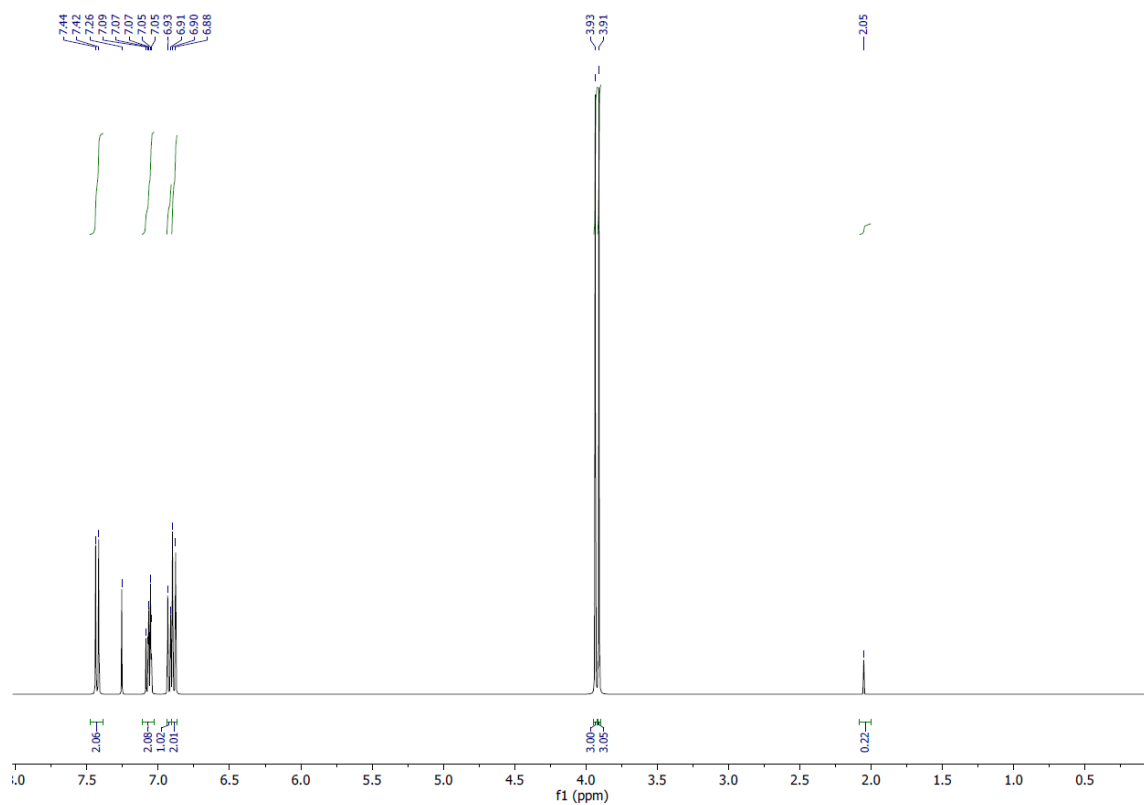

**Figure S12.** <sup>1</sup>H NMR spectra (400 MHz, CDCl<sub>3</sub>) of 4-(3,4-dimethoxyphenyl)-4-hydroxycyclohexa-2,5-dien-1-one (5)

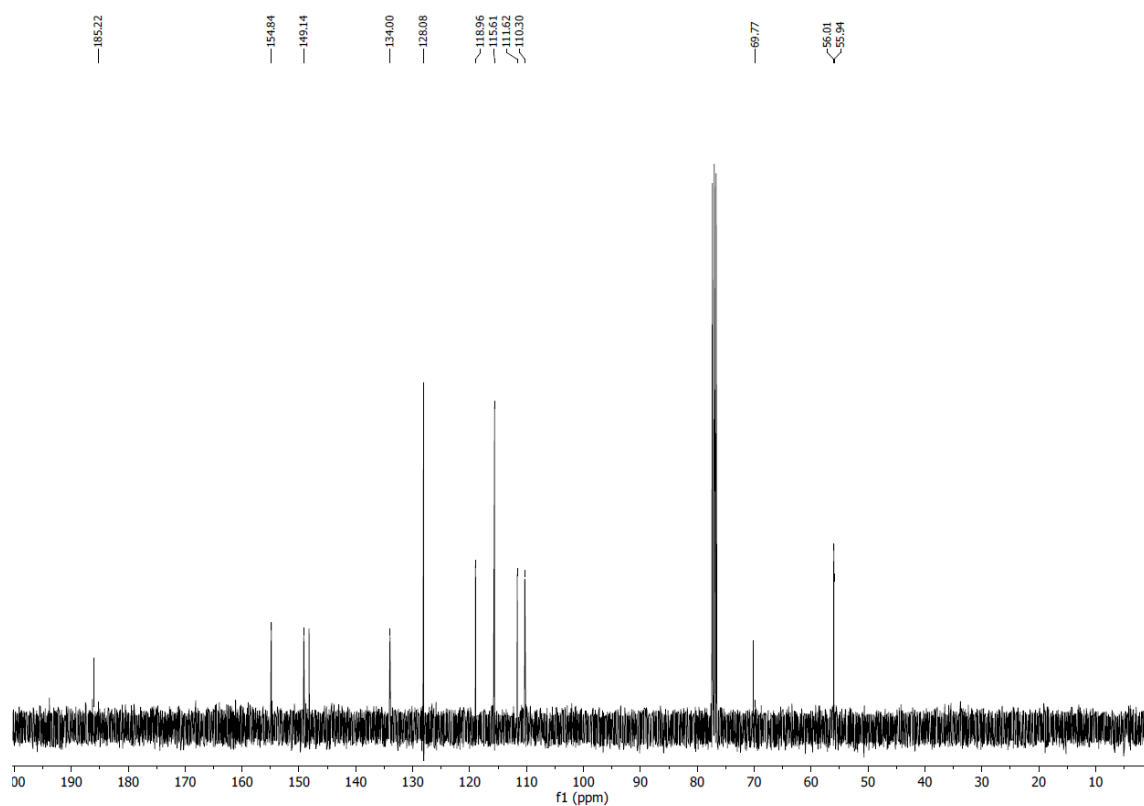

**Figure S13.** <sup>13</sup>C NMR spectra (100 MHz, CDCl<sub>3</sub>) of 4-(3,4-dimethoxyphenyl)-4-hydroxycyclohexa-2,5-dien-1-one (5)

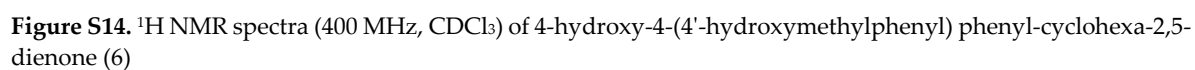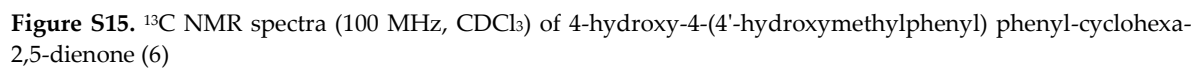



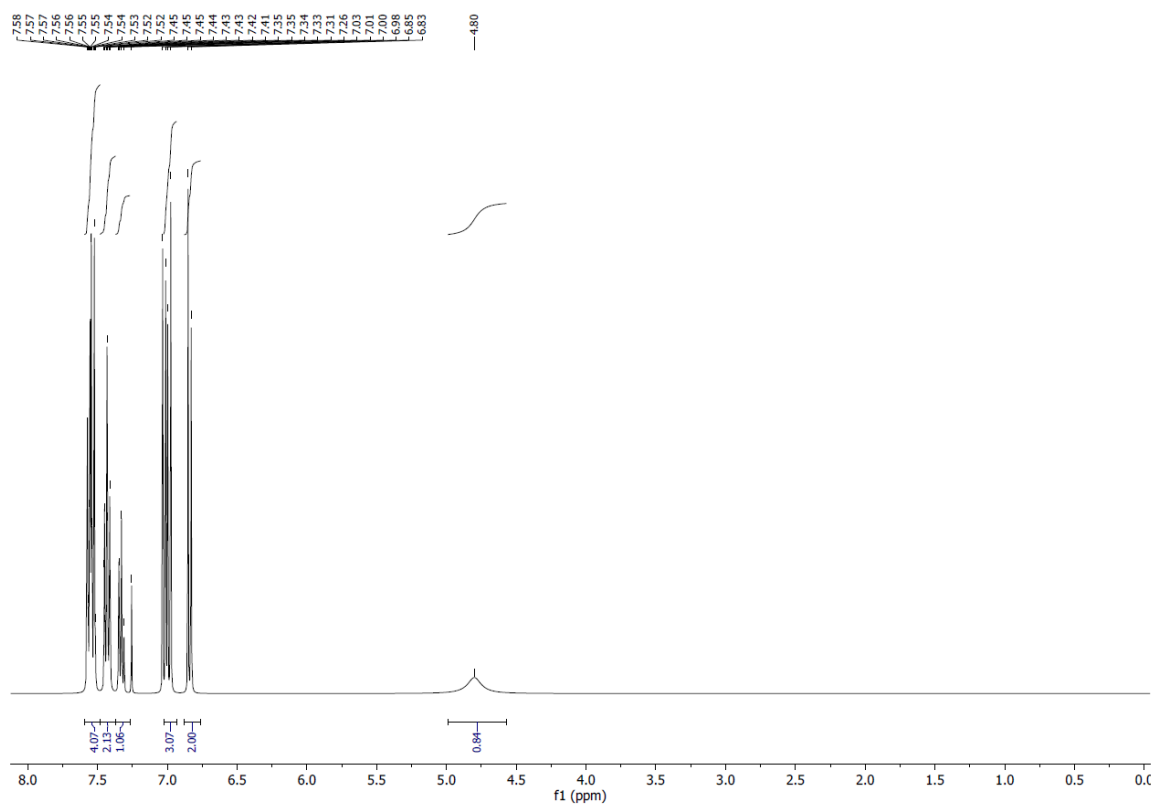

**Figure S16.** <sup>1</sup>H NMR spectra (400 MHz, CDCl<sub>3</sub>) of 4-hydroxy-4-(4'-biphenyl) phenyl-cyclohexa-2,5-dienone (7)

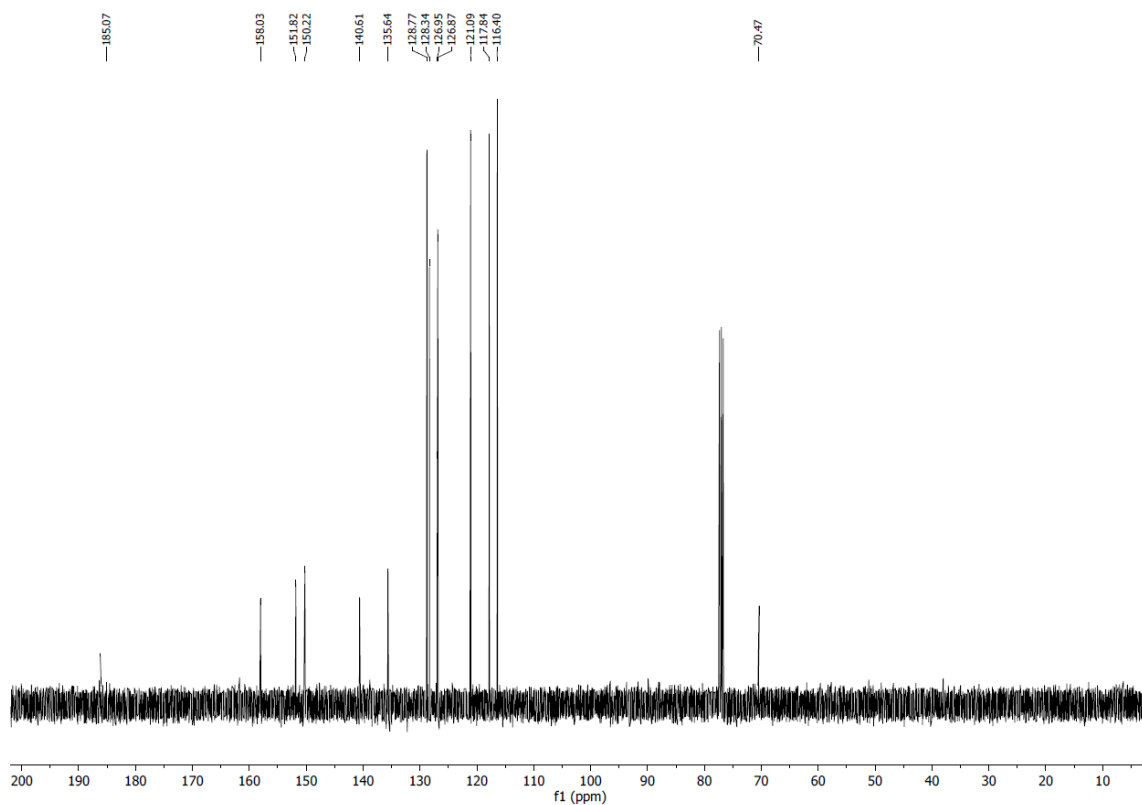

**Figure S17.** <sup>13</sup>C NMR spectra (100 MHz, CDCl<sub>3</sub>) of 4-hydroxy-4-(4'-biphenyl) phenyl-cyclohexa-2,5-dienone (7)

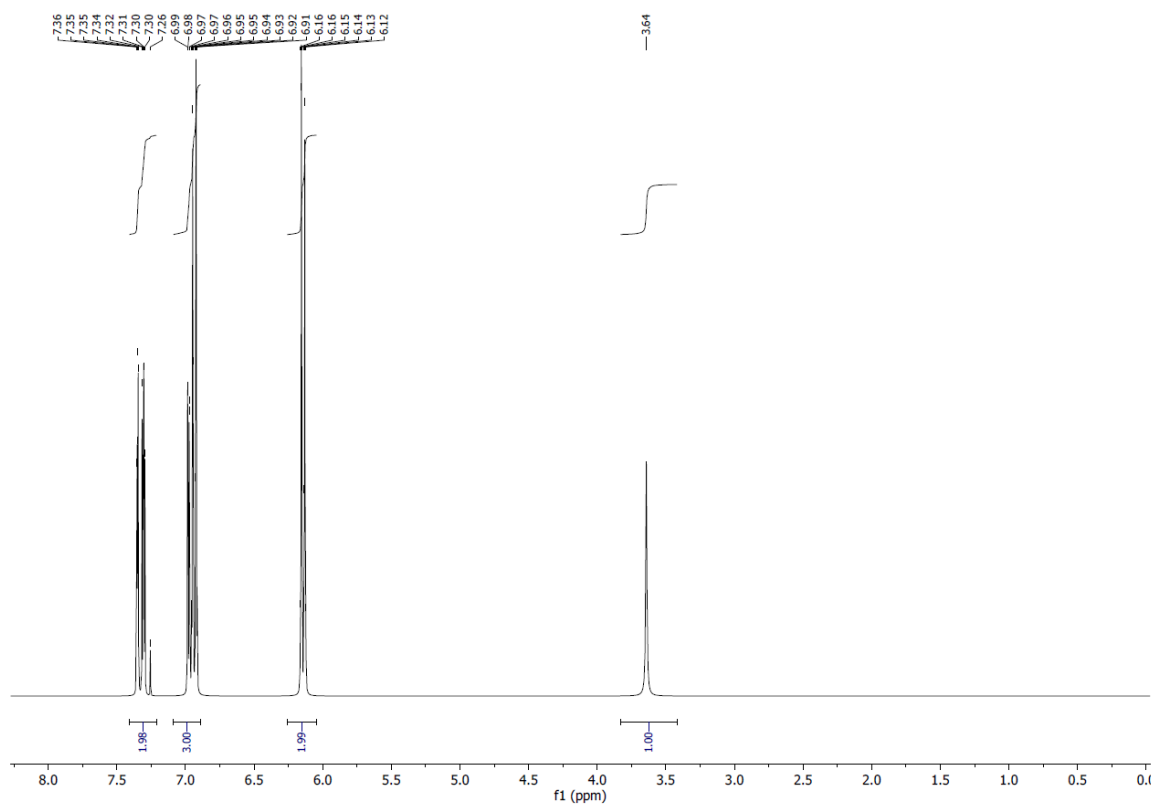

**Figure S18.**  $^1\text{H}$  NMR spectra (400 MHz,  $\text{CDCl}_3$ ) of 4-hydroxy-4-(thiophen-3-yl) phenyl-cyclohexa-2,5-dienone (8)

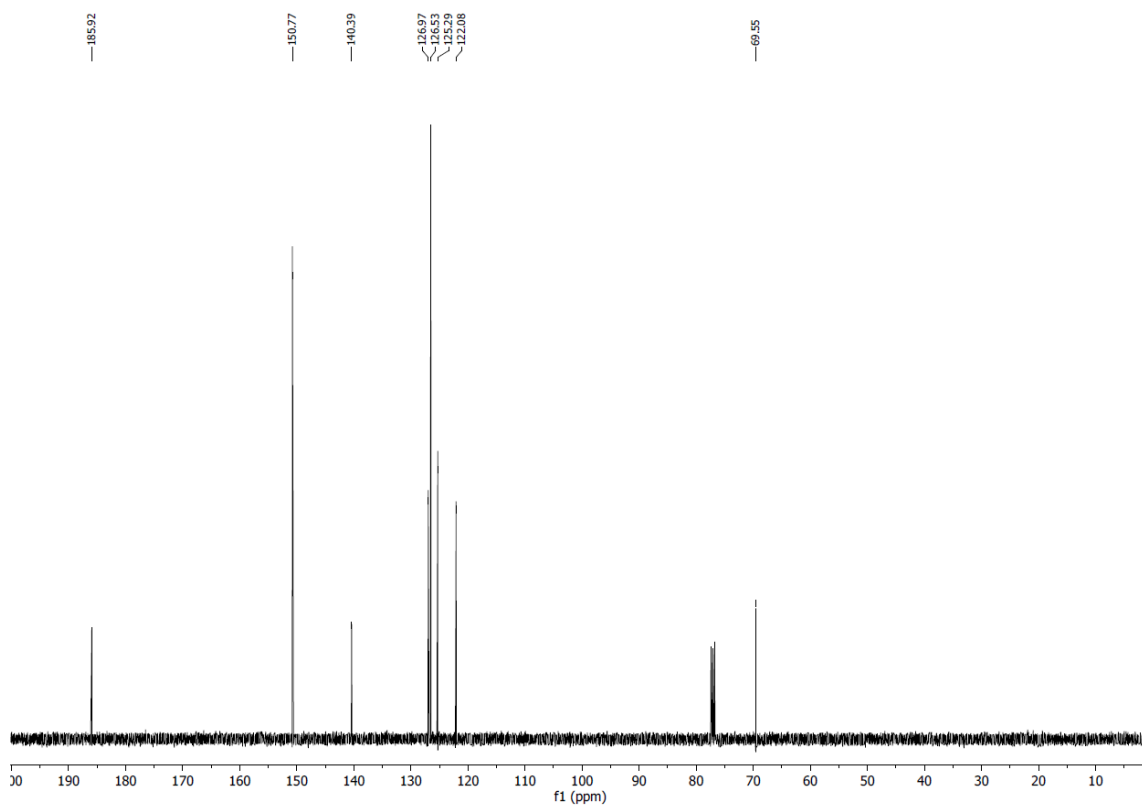

**Figure S19.**  $^{13}\text{C}$  NMR spectra (100 MHz,  $\text{CDCl}_3$ ) of 4-hydroxy-4-(thiophen-3-yl) phenyl-cyclohexa-2,5-dienone (8)

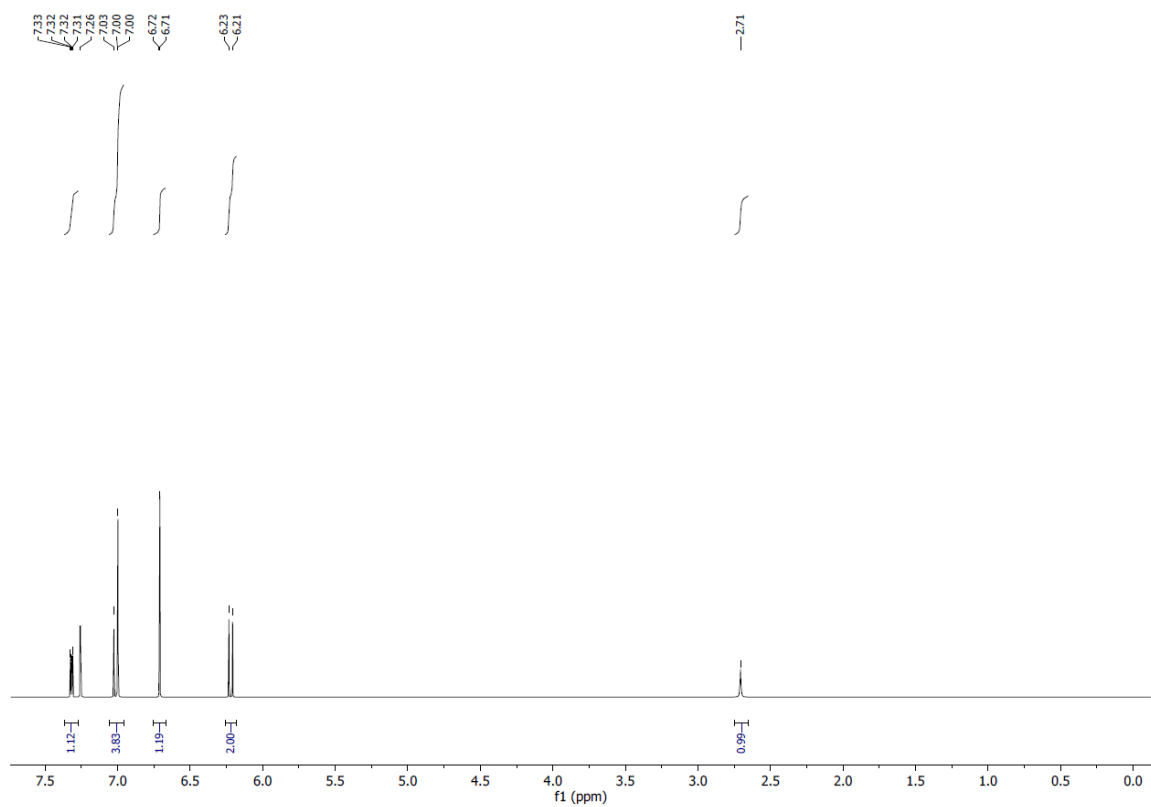

**Figure S20.** <sup>1</sup>H NMR spectra (400 MHz, CDCl<sub>3</sub>) of 4-hydroxy-4-(furan-3-yl) phenyl-cyclohexa-2,5-dienone (9)

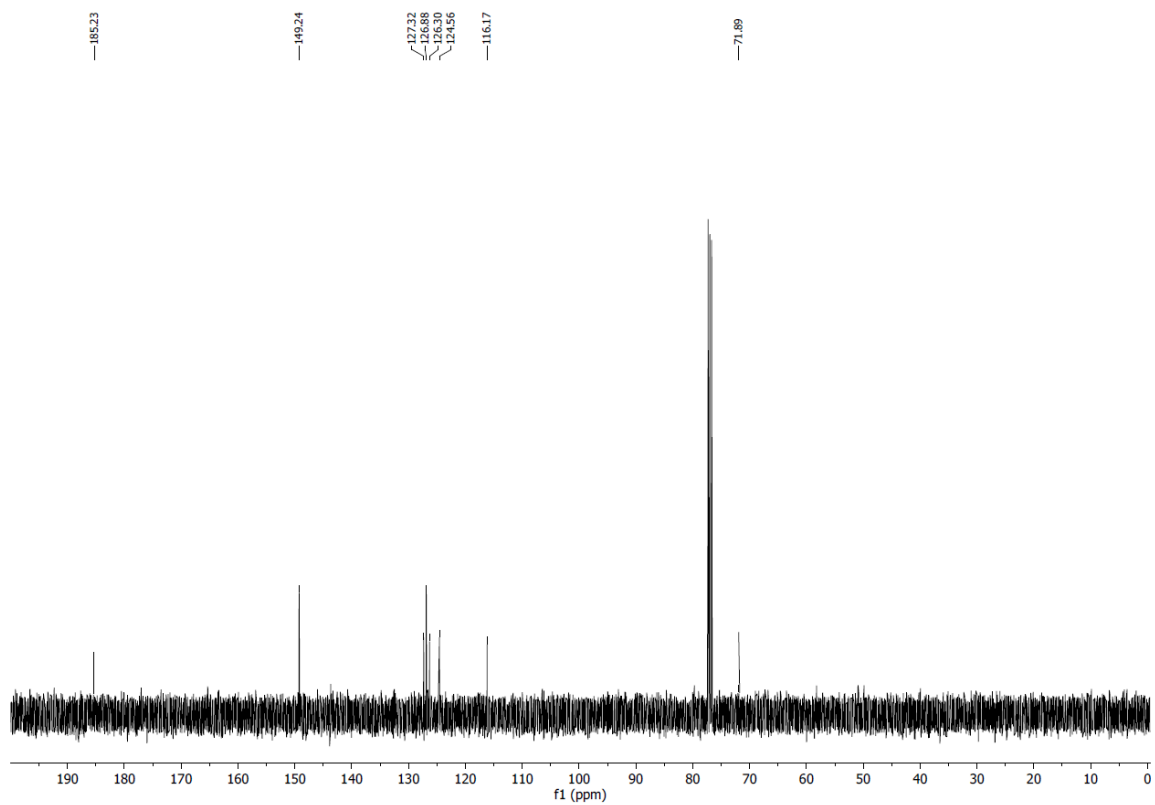

**Figure S21.** <sup>13</sup>C NMR spectra (100 MHz, CDCl<sub>3</sub>) of 4-hydroxy-4-(furan-3-yl) phenyl-cyclohexa-2,5-dienone (9)

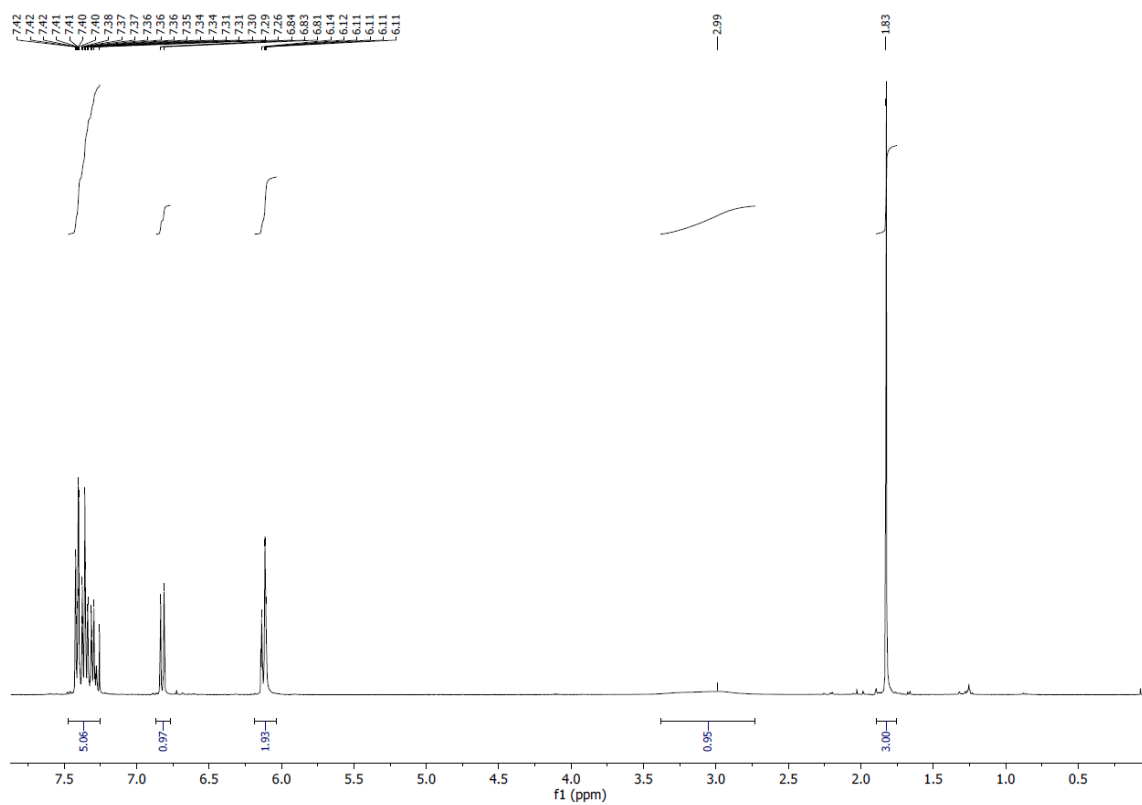

**Figure S22.** <sup>1</sup>H NMR spectra (400 MHz, CDCl<sub>3</sub>) of 4-hydroxy-2-methyl-4-phenyl-2,5-cyclohexadienone (10)

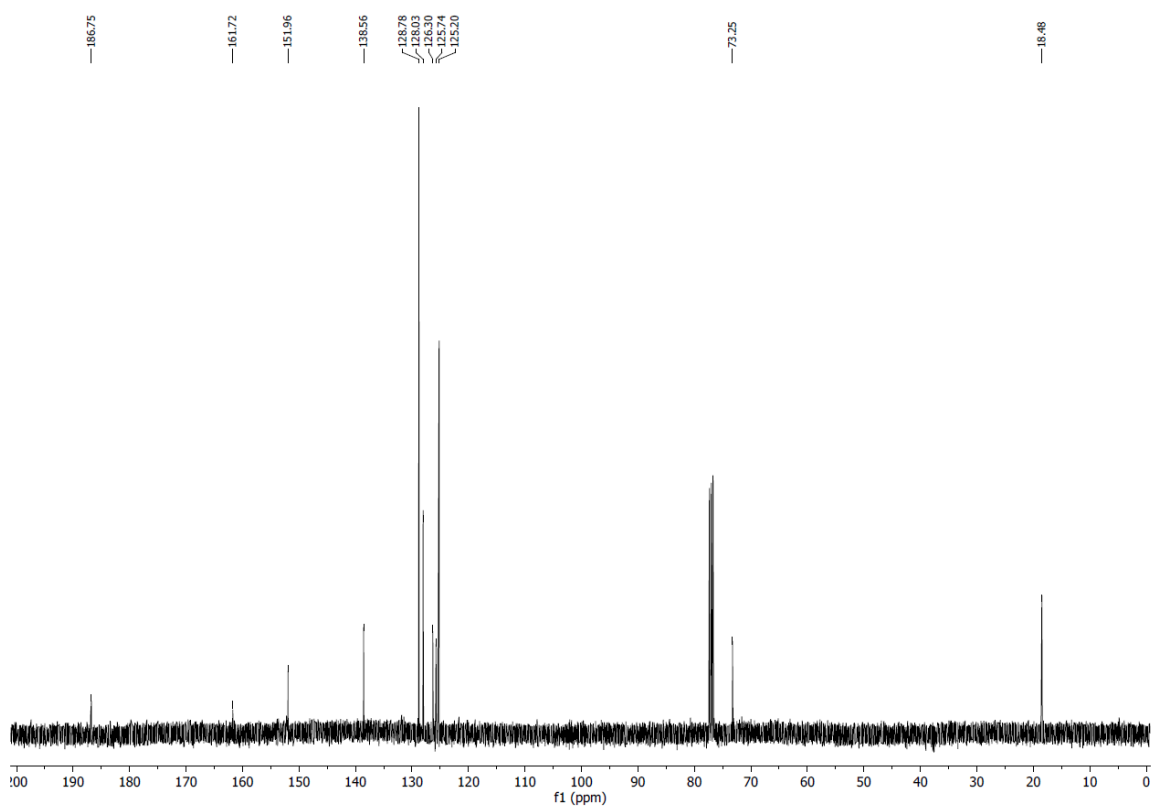

**Figure S23.** <sup>13</sup>C NMR spectra (100 MHz, CDCl<sub>3</sub>) of 4-hydroxy-2-methyl-4-phenyl-2,5-cyclohexadienone (10)

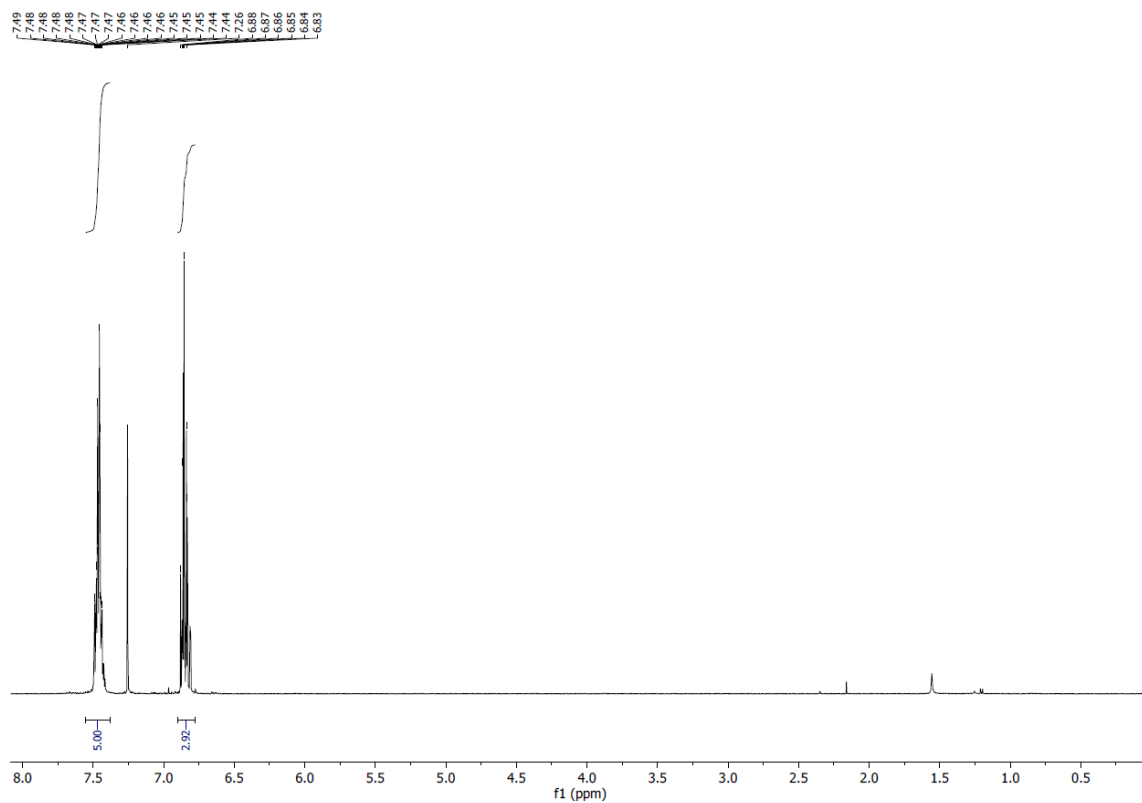

**Figure S24.**  $^1\text{H}$  NMR spectra (400 MHz,  $\text{CDCl}_3$ ) of 2-phenyl-1,4-benzoquinone (15)

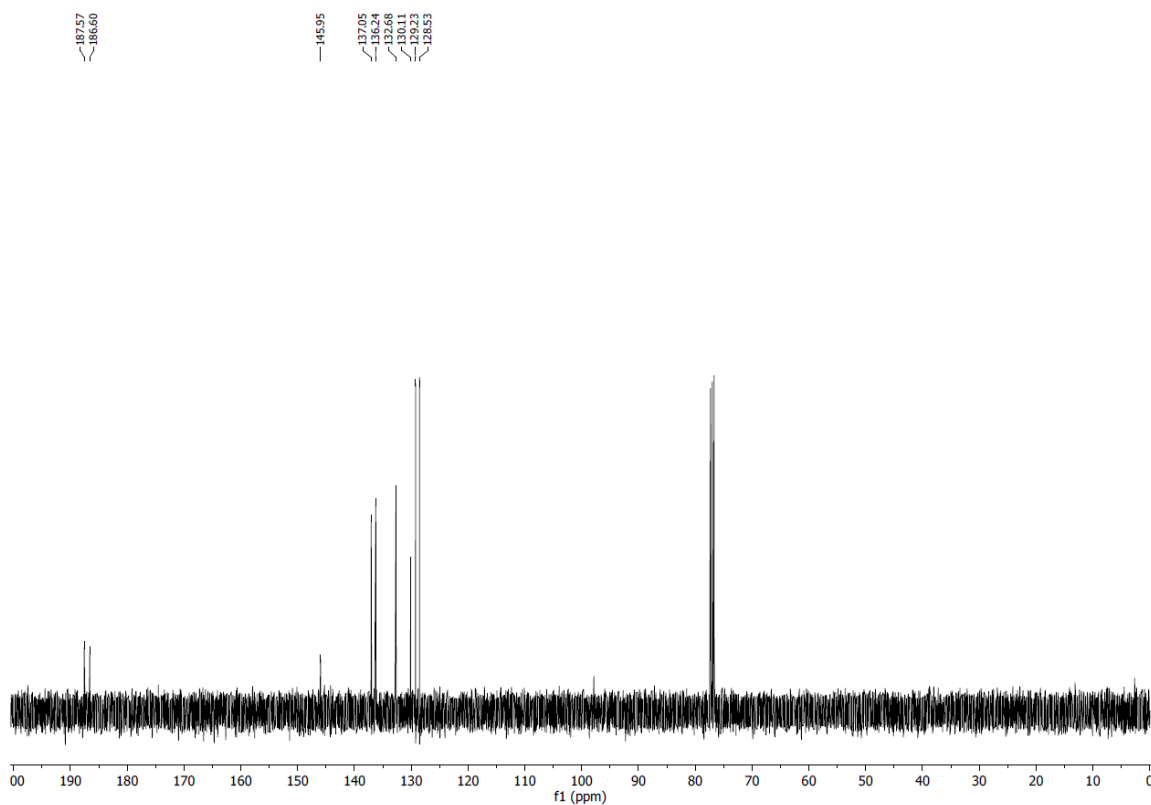

**Figure S25.**  $^{13}\text{C}$  NMR spectra (100 MHz,  $\text{CDCl}_3$ ) of 2-phenyl-1,4-benzoquinone (15)
